# Supplementary material
Source: HighWire-hosted journal article supplement (https://bmjopen.bmj.com/content/13/2/e068291)

版本号：1.0

版本日期：2022.02.15

## 中国医学科学院北京协和医院 临床科研知情同意书

(适用于信息采集，不干预临床诊疗的研究；仅供参考，请研究者根据研究内容修订)

项目名称：胃镜检查产生气溶胶相关的暴露测量及干预措施

研究机构：中国医学科学院北京协和医院

研究负责人：张晟瑜

联系电话：17521679101

\_\_\_\_\_ (受试者)：

您将被邀请参加一项临床研究。您参加本项研究是自愿的，本知情同意书提供给您一些信息以帮助您决定是否参加此项临床研究。请您仔细阅读，如有任何疑问请向负责该项研究的研究者提出。

**1. 研究背景与目的：**飞沫、气溶胶传播是引发呼吸道传染性疾病大规模暴发的主要传播途径，在患者聚集且封闭的医院诊疗场所，尤其是消化内镜中心等操作区域，气溶胶风险尤为突出。当感染患者或无症状感染者接受消化内镜检查时，咳嗽、暖气等行为可能排放高浓度气溶胶飞沫，加之医护人员与患者的近距离暴露可能导致潜在的医源性感染。因此，明确消化内镜诊疗时呼出飞沫、气溶胶传播风险，阐明医护人员个体暴露水平，对优化消化内镜诊室环境控制策略，有效降低消化内镜医护人员职业暴露感染风险，具有积极意义。

为进一步探索上述所提出的问题，本研究融合建筑环境与医学领域前沿交叉技术，为明确消化诊室潜在的重点暴露区域，量化医护个体暴露水平，阐明呼出飞沫传播途径的暴露风险，提供科学依据。

**2. 研究内容、方法及程序：**如果您符合入组条件，并愿意参加本研究，请签署知情同意书。我们将在全麻胃镜操作开始之前，采用医用无毒荧光剂（符合我国每日营养推荐剂量的维生素 B<sub>2</sub> 水溶液）标记于您的口腔中，之后按常规步骤进行胃镜检查，全程严格按照各项 SOP 和实验方案进行操作。

维生素 B<sub>2</sub> 是一种机体必需的水溶性维生素：它能促进发育和细胞的再生；促使皮肤、指甲、毛发的正常生长；帮助预防和消除口腔内、唇、舌及皮肤的炎症反应；增进视力，减轻眼睛的疲劳等。因其水溶性特征，它不会蓄积在体内，所以时常要以食物或营养补品来补充。它广泛存在于酵母、肝、肾、蛋、奶、大豆中。本研究在口腔内滴入的维生素 B<sub>2</sub>，在胃镜检查结束后可由漱口去除，经

口腔吸收的微量维生素 B<sub>2</sub> 不会对您的健康状态及疾病后续诊治计划产生影响。

**3. 预期收益:** 尽管参加本次研究可能不会给您带来直接益处, 但通过对您胃镜操作过程中呼出飞沫→环境迁移→医护暴露过程的监测和研究将有助于明确消化内镜诊疗时环境物表间接接触、呼出飞沫、气溶胶传播风险, 阐明医护人员个体暴露水平, 对优化消化内镜诊室环境控制策略, 有效降低消化内镜医护人员职业暴露感染风险, 保护医护人员诊疗安全, 为未来医学事业发展做出贡献。

**4. 可能风险:** 该研究所涉及的干预为体外仿生系统(模拟医护)是否佩戴标准个人防护装置, 就患者而言除使用医用无毒荧光剂标记口腔外无任何额外处理(入组时已排除维生素 B<sub>2</sub> 水溶液过敏者), 内镜操作医师均按常规步骤进行胃镜检查, 全程严格按照各项 SOP 和实验方案进行操作, 不会对疾病后续诊断和治疗计划产生影响。故理论上不存在可能的风险。

**5. 有关费用和赔偿:** 本研究基于科学需求, 仅涉及采用医用无毒荧光剂(维生素 B<sub>2</sub> 水溶液)标记于受检者口腔, 不会产生额外的费用, 且不会给患者带来额外风险, 故不存在赔偿问题。

**6. 作为研究受试者, 您有以下职责:** 提供有关自身病史和当前身体状况的真实情况, 以及是否有医用无毒荧光剂(维生素 B<sub>2</sub> 水溶液)过敏史或潜在过敏风险, 是否在接受抗肿瘤药物治疗; 告诉研究医生自己在最近是否曾参与其他研究, 或目前正参与其他研究。

**7. 保密隐私问题:** 如果您决定参加本项研究, 您的隐私非常重要, 本临床研究收集到的所有信息都被保密。

在本临床研究中, 您的医疗记录档案将保存在有锁的档案柜中, 为了保护您的隐私, 会分配给您一个研究专用代码, 仅通过研究专用代码来识别您。监管部门、伦理审查委员会成员、研究中心的工作人员和申办方的代表将获准会访问可能识别您身份的原始医疗记录等数据(包括直接访问您的原始医疗记录)以确保提供信息的正确性。签署了这份同意书, 就表明您允许前述这些组织的人员直接查看您的医疗记录。根据法律规定, 您的医疗记录不会公布。

如果研究结果公开发表, 您的个人身份将被保密。签署了这份同意书, 就表明您同意我们使用您的信息。

为了科学研究之目的, 收集的信息可能会发送给其它合作单位或公司, 以及监管机构, 还可能会将您的信息与研究伙伴分享。与研究伙伴进行分享之前, 会在您的信息上标注一个不同于您的研究编号的代码。您的信息中不会带有任何个人身份识别信息。你的信息不会被出售、出借或赠予任何其它独立团体供其自行使用。与申办方合作的研究伙伴不得将您的信息与未获申办方授权的任何人士分享。申办方将控制对您的信息进行的操作。

**8. 退出:** 您可以选择不参加本项研究, 或者在任何时候通知研究者后退出, 您的任何医疗待遇与权益不会因此而受到影响。

**9. 伦理原则说明:** 本项研究的研究人员及工作程序将遵守《赫尔辛基宣言》、

《涉及人的生物医学研究伦理审查办法》、GCP 及中国相关法律法规。

**10. 联系：**您可随时了解与本研究有关的信息资料和研究进展，如果您有与本研究有关的问题，或您在研究过程中发生了任何不适与损伤，或有关于本项研究参加者权益方面的问题您可以联系电话 17521679101；如果在研究过程中您有关于伦理方面的问题，可以联系伦理委员会办公室，地址：北京市东城区帅府园 1 号；联系电话：010-69156874

### 知情同意书签字页

在签署这份知情同意书之前，我已经阅读过本知情同意书，研究者已经向我解释过知情同意书的内容。我确认已有充分的时间考虑，我有机会提问而且所有问题均已得到解答。我可以随时向医生咨询更多信息，我可以选择不参加本项研究，或者在任何时候通知研究者后退出，我的任何医疗待遇与权益不会因此而受到影响。

如果我没有遵守研究计划，或者发生了与研究相关的损伤或者有任何其它原因，研究医生可以终止我继续参与本项研究。

我自愿参加本项研究，且已自愿签署这份知情同意书，并与研究者全面合作。

受试者姓名（正楷）：\_\_\_\_\_

受试者签名：\_\_\_\_\_ 联系电话\_\_\_\_\_

日期：\_\_\_\_\_年\_\_\_\_\_月\_\_\_\_\_日

（如适用：如果受试者系无民事行为能力或部分民事行为能力人时则需法定代理人签名。见证人是否需要签字，视情况而定）

家属            法定代理人

姓名（正楷）：\_\_\_\_\_

签名：\_\_\_\_\_

与受试者关系：\_\_\_\_\_ 联系电话：\_\_\_\_\_

日期：\_\_\_\_\_年\_\_\_\_\_月\_\_\_\_\_日

我已准确地将这份文本告知受试者，他/她准确地阅读了这份知情同意书，并证明该受试者有机会提出问题。我证明他/她是自愿同意的。

研究者姓名（正楷）：\_\_\_\_\_

研究者签名：\_\_\_\_\_ 研究者联系电话：\_\_\_\_\_

日期：\_\_\_\_\_年\_\_\_\_\_月\_\_\_\_\_日

## 胃镜检查产生气溶胶相关的暴露测量及干预措施

### 附录 1 体外仿生测量系统

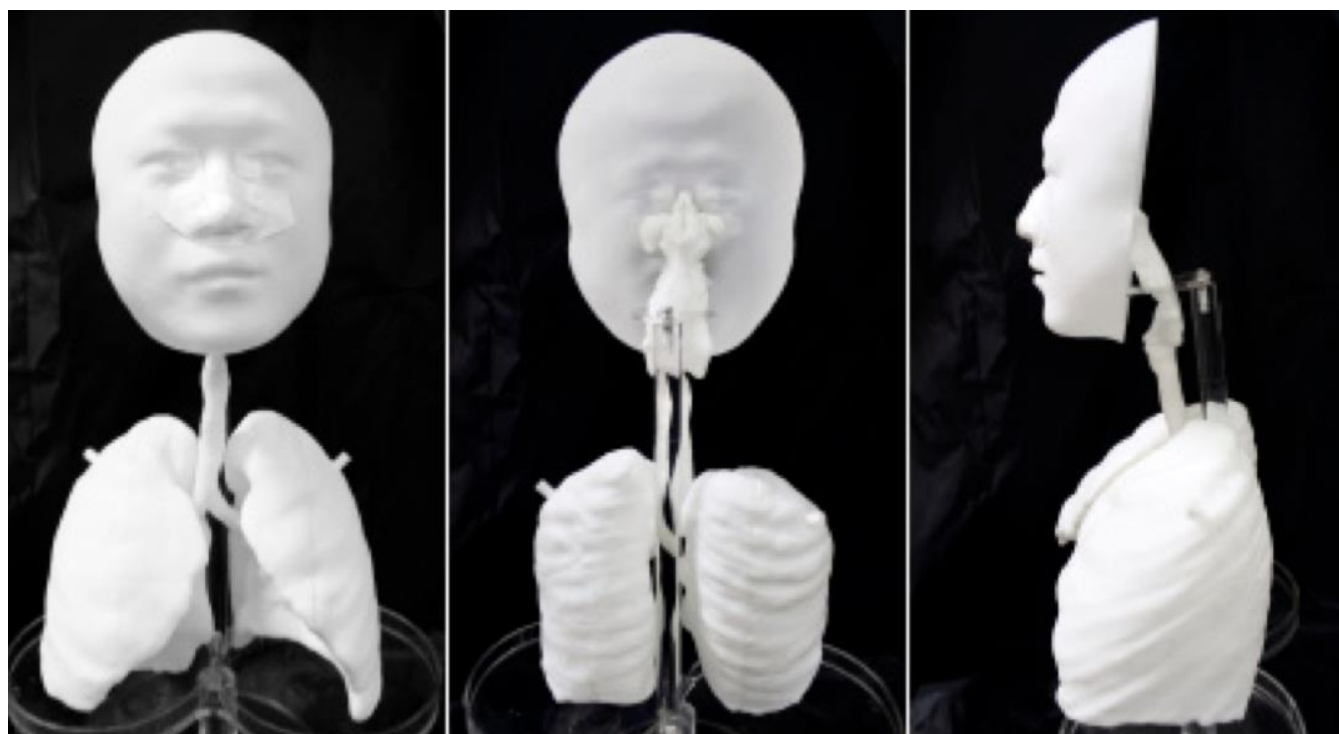

Supplement: inline-supplementary-material-2 [file inline-supplementary-material-2.pdf]
